# Supplementary material for: Bright solid-state luminescence and high-temperature resistance of Ga-doped carbon dots with ultra-wideband white emission for light-emitting diodes
Source: Royal Society of Chemistry journal article supplement (doi:10.1039/d3dt03082b), 2023-01-01
Supplement: d3dt03082b1.pdf [file d3dt03082b1.pdf]

## Supporting Information

### **Bright Solid-State Luminescence and High-Temperature Resistance of Ga-Doped Carbon Dots with Ultra-Wideband White Emission for Light-Emitting Diodes**

Xiao Gao, Hongquan Yu\*, Zhanwen Han, Baojiu Chen\*, Jiashi Sun, Xiangping Li

Department of Physics, Dalian Maritime University, Dalian 116026, Liaoning, China

\*Corresponding author: **Hongquan Yu and Baojiu Chen**

Address: No. 1, Linghai Road, Dalian 116026, Liaoning, P.R. China

E-mail: yuhq7808@126.com (H. Yu); bjchen@dlnu.edu.cn (B. Chen)

Tel/ Fax: +86-411-84728909

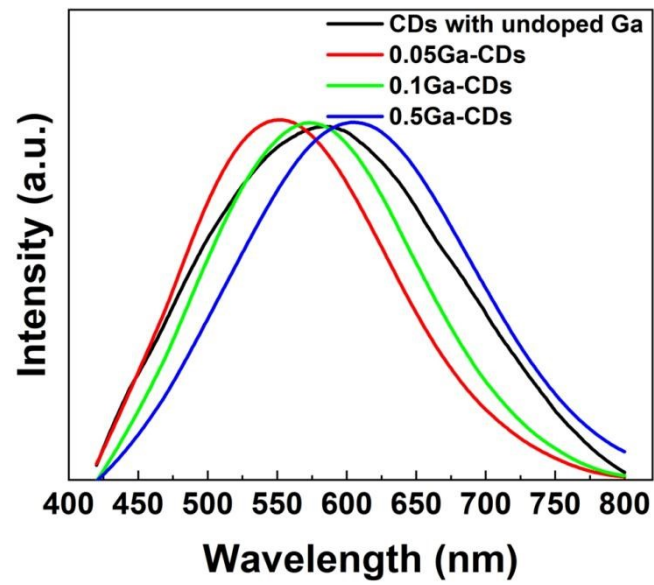

Fig. S1. PL spectra of the CDs with undoped Ga, 0.05 Ga CDs, 0.1 Ga CDs and 0.5 Ga CDs under 365 nm excitation.

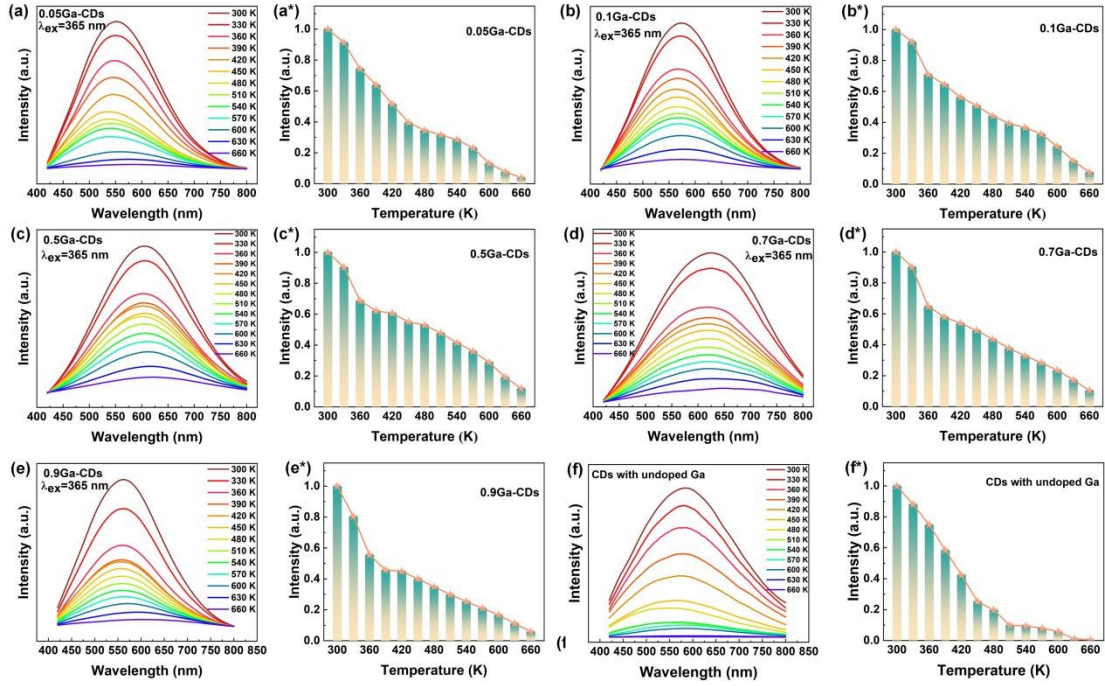

Fig. S2. Temperature dependence of PL spectra and integral emission intensity of the (a, a\*) 0.05Ga-CDs, (b, b\*) 0.1Ga-CDs, (c, c\*) 0.5Ga-CDs, (d, d\*) 0.7Ga-CDs, (e, e\*) 0.9Ga-CDs and (f, f\*) CDs with undoped Ga under 365 nm excitation.

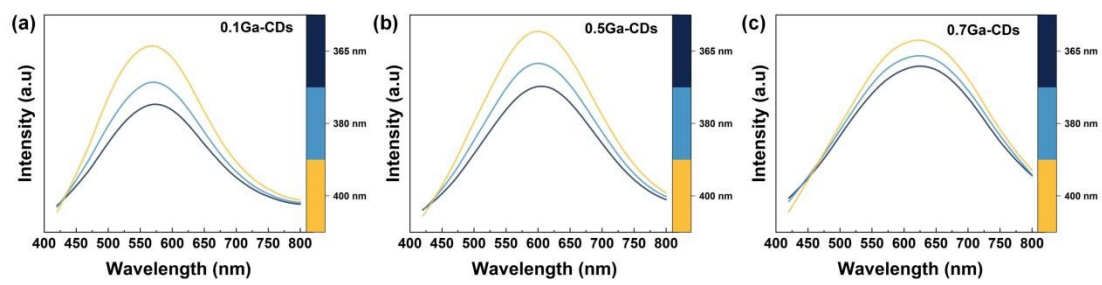

Fig. S3. PL spectra of 0.1Ga CDs, 0.5Ga CDs, and 0.7Ga-CDs, respectively, phosphors under different excitation lights.

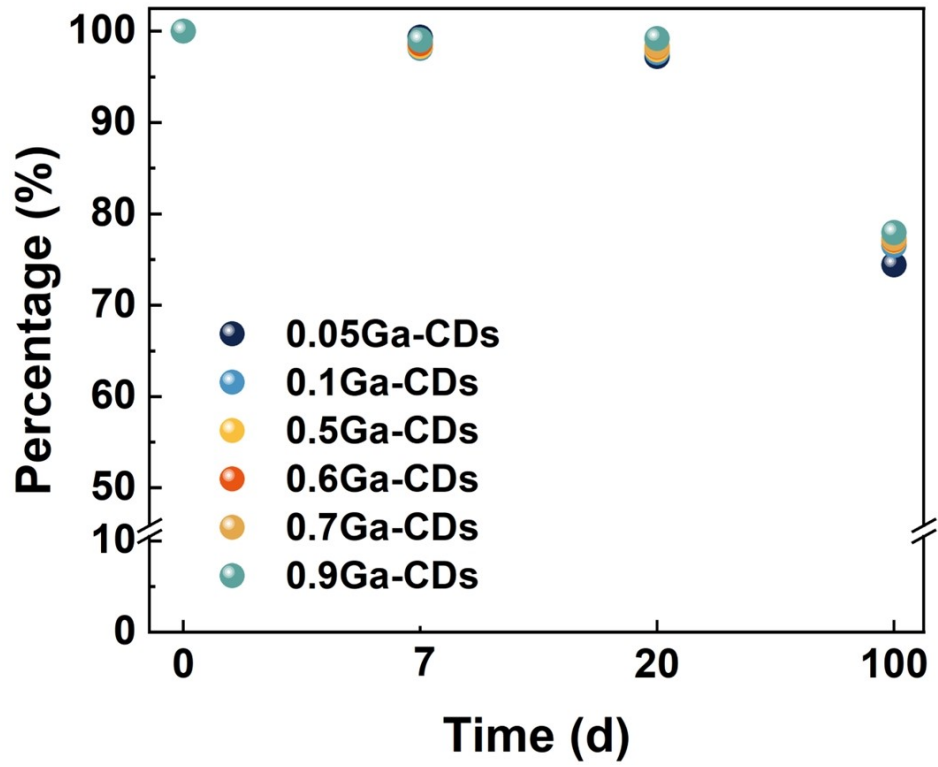

Fig. S4. Strength map for 100 days under natural conditions.

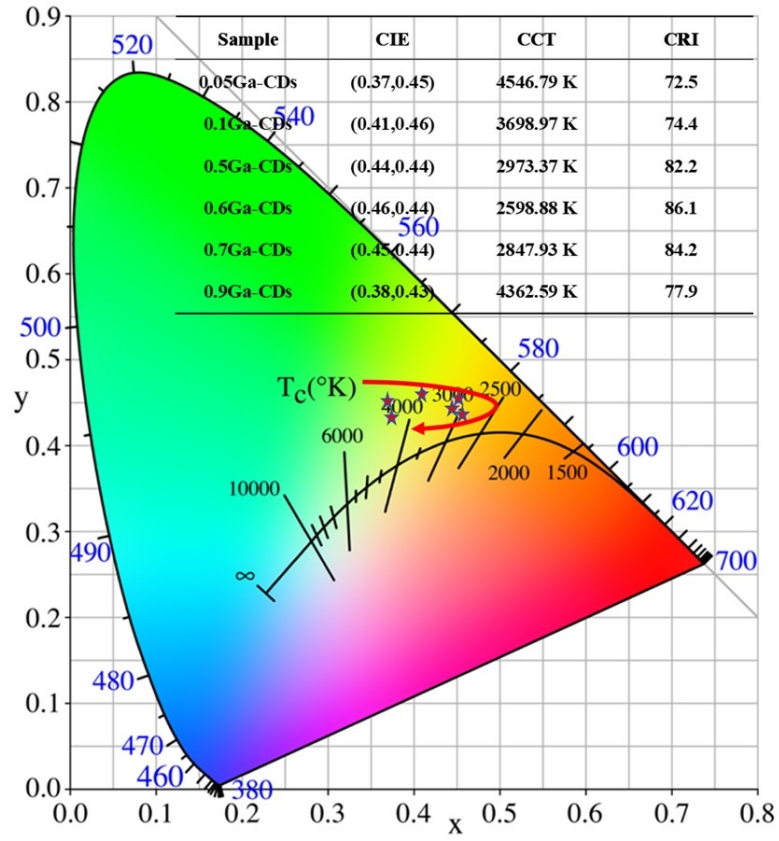

Fig. S5. Calculate the PL emission color coordinates, CCT,CRI in the CIE 1931 chrominance diagram.

Table S1. The excitation and emission peak and FWHM values of the CDs doped with different metal elements.

| Materials           | $E_x/E_m$ (nm) | FWHM (nm) | Ref.      |
|---------------------|----------------|-----------|-----------|
| Eu-CDs              | 350/465        | 151       | [56]      |
| Tb-CDs              | 320/450        | 112       | [57]      |
| La-CDs              | 350/460        | 143       | [58]      |
| Cu-CDs              | 340/410, 470   | 110       | [59]      |
| Mn-CDs              | 365/482        | 92        | [60]      |
| Al-CDs              | 345/415        | 75        | [61]      |
| Ag-CDs              | 300/358        | 92        | [62]      |
| Fe-CDs              | 360/430        | 73        | [63]      |
| Zn-CDs              | 365/460        | 118       | [64]      |
| CDs with undoped Ga | 365/581        | 193       | This work |
| 0.05Ga-CDs          | 365/550        | 173       | This work |
| 0.1Ga-CDs           | 365/575        | 178       | This work |
| 0.5Ga-CDs           | 365/600        | 199       | This work |
| 0.6Ga-CDs           | 365/650        | 262       | This work |
| 0.7Ga-CDs           | 365/625        | 237       | This work |
| 0.9Ga-CDs           | 365/560        | 193       | This work |

Table S2. Comparison of the PLQY of Ga-doped CDs with different Ga concentrations at 0 days and after 100 days in natural environment.

| Sample     | 0day-PLQY (%) | 100day-PLQY (%) |
|------------|---------------|-----------------|
| 0.05Ga-CDs | 9.77          | 3.88            |
| 0.1Ga-CDs  | 9.01          | 3.07            |
| 0.5Ga-CDs  | 9.76          | 3.65            |
| 0.6Ga-CDs  | 10.75         | 6.33            |
| 0.7Ga-CDs  | 11.79         | 6.51            |
| 0.9Ga-CDs  | 15.85         | 10.33           |



| Sample     | C1s     |       | O1s  |       |
|------------|---------|-------|------|-------|
| 0.05Ga-CDs | C=C/C-C | 45.23 | C=O  | 34.39 |
|            | C-O     | 29.39 | B-O  | 23.24 |
|            | C=O     | 25.38 | C-O  | 22.04 |
|            |         |       | Ga-O | 20.33 |
| 0.6Ga-CDs  | C=C/C-C | 37.70 | C=O  | 24.21 |
|            | C-O     | 34.07 | B-O  | 29.57 |
|            | C=O     | 28.23 | C-O  | 27.63 |
|            |         |       | Ga-O | 18.59 |
| 0.9Ga-CDs  | C=C/C-C | 42.57 | C=O  | 31.51 |
|            | C-O     | 31.90 | B-O  | 26.65 |
|            | C=O     | 25.53 | C-O  | 23.61 |
|            |         |       | Ga-O | 18.23 |

Table S4. Chemical bond content (%) of 0.05Ga-CDs, 0.6Ga-CDs, 0.9Ga-CDs.

Table S5. The fluorescence lifetimes of the Ga-doped CDs with different Ga concentrations.

| Sample     | A1 (%)  | $\tau_1$ (s) | A2 (%)  | $\tau_2$ (s) | $\tau_{\text{avg}}$ ( ns) |
|------------|---------|--------------|---------|--------------|---------------------------|
| 0.05Ga-CDs | 0.77387 | 0.0883       | 0.2178  | 0.81791      | 0.61563                   |
| 0.1Ga-CDs  | 0.85712 | 0.04347      | 0.13874 | 0.75096      | 0.5646                    |
| 0.5Ga-CDs  | 0.87111 | 0.04402      | 0.12489 | 0.89263      | 0.67544                   |
| 0.6Ga-CDs  | 0.87569 | 0.04193      | 0.11194 | 0.7077       | 0.49685                   |
| 0.7Ga-CDs  | 0.88378 | 0.04458      | 0.10959 | 0.80934      | 0.57412                   |
| 0.9Ga-CDs  | 0.89606 | 0.04301      | 0.10074 | 0.83541      | 0.58652                   |
